# Supplementary material
Source: PubMed Central journal article supplement (PMC8284456)
Supplement: aac00095-21_supp_1_seq5.pdf [file aac00095-21_supp_1_seq5.pdf]

**High proportion of genome-wide homology and increased pre-treatment *pvcrt* levels in *Plasmodium vivax* late recurrences: a chloroquine therapeutic efficacy study**

Eduard Rovira-Vallbona<sup>1#</sup>, Nguyen Van Hong<sup>2</sup>, Johanna H. Kattenberg<sup>1</sup>, Ro Mah Huan<sup>3</sup>,  
Nguyen Thi Huong Binh<sup>2</sup>, Nguyen Thi Hong Ngọc<sup>2</sup>, Pieter Guetens<sup>1</sup>, Nguyen Luong Hieu<sup>2</sup>,  
Nguyen Thị Thu Hien<sup>2</sup>, Vu Thi Sang<sup>2</sup>, Nguyen Duc Long<sup>2</sup>, Erin Sauve<sup>1</sup>, Tran Thanh Duong<sup>2</sup>,  
Nguyen Xuan Xa<sup>2</sup>, Annette Erhart<sup>1,4</sup>, Anna Rosanas-Urgell<sup>1#</sup>

<sup>1</sup> Department of Biomedical Sciences, Institute of Tropical Medicine, Antwerp, Belgium.

<sup>2</sup> National Institute of Malariology, Parasitology and Entomology, Hanoi, Vietnam.

<sup>3</sup> Centre for Disease Control and Prevention, Gia Lai, Vietnam.

<sup>4</sup> Medical Research Council Unit The Gambia at the London School of Hygiene and Tropical Medicine, Fajara, The Gambia.

E.R.V. and N.V.H. contributed equally to this work.

## **Supplemental Material**

**Table S1. PCR reaction mixes and thermocycling conditions.**

A) PCR reaction mixes and thermocycling conditions for microsatellite genotyping.

| Gene                   | Primer sequences                                                                                                  | qPCR mix (µl)                                                                                                                                                                                                                              | Thermocycling conditions                                                          |
|------------------------|-------------------------------------------------------------------------------------------------------------------|--------------------------------------------------------------------------------------------------------------------------------------------------------------------------------------------------------------------------------------------|-----------------------------------------------------------------------------------|
| <b><i>pvmSP1F3</i></b> | msp1F3-fwdp:<br>5'-GGAGAACATAAGCTACCTGTCC-3'                                                                      | Hotstart 10x Buffer 2<br>dNTP mix (20mM) 2<br>MgCl2 (25 mM) 1.6<br>Forward Primer (10µM) 0.5<br>Reverse Primer (10µM) 0.5<br>Hotstart Taq Polymerase (Qiagen) 0.2<br>H <sub>2</sub> O Molecular Biology grade 8.2<br>DNA 5                 | 1x 95°C, 10min<br>95°C, 15sec<br>25x 59°C, 30sec<br>72°C, 30sec<br>1x 72°C, 10min |
|                        | msp1F3-fwdn:<br>VIC-5'-CAAGCCTACCAAGAATTGATCCCCAA-3'<br>msp1F3-revn:<br>5'-ATTACTTTGTCTAGTCTCGGCGTAGTCC-3' + tail | Hotstart 10x Buffer 2<br>dNTP mix (20mM) 2<br>MgCl2 (25 mM) 1.6<br>Forward Primer (10µM) 0.5<br>Reverse Primer (10µM) 0.5<br>Hotstart Taq Polymerase (Qiagen) 0.2<br>H <sub>2</sub> O Molecular Biology grade 8.2<br>Primary PCR product 5 | 1x 95°C, 10min<br>95°C, 15sec<br>25x 59°C, 30sec<br>72°C, 30sec<br>1x 72°C, 10min |
| <b>MS4</b>             | MS4-fwd:<br>PET-5'- CGATTTACTGTTGACGCTGAA-3'<br>MS4-rev:<br>5'-CTGTCTTCAAAGGAACATGCTCGATGA-3'                     | Hotstart 10x Buffer 2.5<br>dNTP mix (20mM) 0.5<br>Forward Primer (10µM) 2<br>Reverse Primer (10µM) 2<br>Acetylated BSA (0,1µg/µl) 0.25<br>Hotstart Taq Polymerase (Qiagen) 0.2<br>H <sub>2</sub> O Molecular Biology grade 12.55<br>DNA 5  | 1x 95°C, 10min<br>95°C, 30sec<br>40x 60°C, 40sec<br>72°C, 40sec<br>1x 72°C, 10min |
| <b>MS10</b>            | MS10fwd:<br>FAM-5'-TTATCCCTGCTGGATGTGAA-3'<br>MS10rev:<br>5'-CTGTCTTTCCTTCAGGTGGGACTTGTT-3'                       | Hotstart 10x Buffer 2.5<br>dNTP mix (20mM) 0.5<br>Forward Primer (10µM) 2<br>Reverse Primer (10µM) 2<br>Acetylated BSA (0,1µg/µl) 0.25<br>Hotstart Taq Polymerase (Qiagen) 0.2<br>H <sub>2</sub> O Molecular Biology grade 12.55<br>DNA 5  | 1x 95°C, 10min<br>95°C, 30sec<br>40x 58°C, 40sec<br>72°C, 40sec<br>1x 72°C, 10min |
| <b>PvSal1814</b>       | PvSal1814-fwd:<br>FAM-5'-AAACAGGCATTAGGTTTAAGAGTG-3'<br>PvSal1814-rev:<br>CAGTGGCTTCTTCTTAGTGG                    | Hotstart 10x Buffer 5<br>dNTP mix (20mM) 0.5<br>Forward Primer (10µM) 1<br>Reverse Primer (10µM) 1<br>acetylated BSA (0,1µg/µl) 0<br>Hotstart Taq Polymerase (Qiagen) 0.2<br>H <sub>2</sub> O Molecular Biology grade 32.3<br>DNA 10       | 1x 95°C, 5min<br>95°C, 30sec<br>40x 54°C, 40sec<br>72°C, 40sec<br>1x 72°C, 8min   |

B) PCR reaction mixes and thermocycling conditions for *pvm<sub>dr1</sub>* genotyping.

| Gene                     | Primer sequences                                                                           | qPCR mix (μl)                                                                                                                                                                                         |                                                | Thermocycling conditions                                                       |
|--------------------------|--------------------------------------------------------------------------------------------|-------------------------------------------------------------------------------------------------------------------------------------------------------------------------------------------------------|------------------------------------------------|--------------------------------------------------------------------------------|
| <i>pvm<sub>dr1</sub></i> | GoIPvmdr-1 OF<br>5'-CGCCATTATAGCCCTGAGCA-3'<br>GoIPvmdr-1 OR<br>5'-TCTCACGTCGATGAGGGACT-3' | 5X Buffer<br>MgCl <sub>2</sub> (25 mM)<br>dNTP mix (20mM)<br>Forward Primer (10μM)<br>Reverse Primer (10μM)<br>GoTaq Polymerase (Promega)<br>H <sub>2</sub> O Molecular Biology grade<br>DNA          | 10<br>5<br>0.5<br>1<br>1<br>0.25<br>27.25<br>5 | 1x 95°C, 5min<br>95°C, 15sec<br>33x 55°C, 30sec<br>72°C, 1min<br>1x 72°C, 7min |
|                          | Lin-mdr1_Fw<br>5'-ATAGTCATGCCCCAGGATTG-3'<br>Lin-mdr1_Rev<br>5'-CCTTTCTGAAGGACAGCTTTG-3'   | Buffer<br>MgCl <sub>2</sub> (25 mM)<br>dNTP mix (20mM)<br>Forward Primer (10μM)<br>Reverse Primer (10μM)<br>GoTaq Polymerase (Promega)<br>H <sub>2</sub> O Molecular Biology grade<br>Primary Product | 10<br>5<br>0.5<br>1<br>1<br>0.25<br>31.25<br>1 | 1x 95°C, 5min<br>95°C, 15sec<br>33x 55°C, 30sec<br>72°C, 1min<br>1x 72°C, 7min |

**Data S1.** (Excel [Data\_S1\_GRC.xlsx]). Genetic Report Card (SpotMalaria). The dataset contains drug-resistance genotypes as well as the SNP barcode (Sheet A). An explanatory table with detail of sequenced positions and reference/mutant codon is provided in Sheet B.

**Table S2. Whole-genome sequencing coverage.**

| Patient code | Day 0              |                                 |                     | Day of recurrence  |                                 |                     |
|--------------|--------------------|---------------------------------|---------------------|--------------------|---------------------------------|---------------------|
|              | parasites/ $\mu$ l | coverage (mean X $\pm$ SD)      | % missing positions | parasites/ $\mu$ l | coverage (mean X $\pm$ SD)      | % missing positions |
| 007          | 41506              | 41.2 $\pm$ 52                   | 0.8%                | 769                | 21.4 $\pm$ 33                   | 4.4%                |
| 008          | 6068               | 27.6 $\pm$ 51                   | 13.8%               | 3428               | 45.0 $\pm$ 43                   | 0.4%                |
| 010          | 5431               | 6.8 $\pm$ 11                    | 0.9%                | 212                | 1.6 $\pm$ 15                    | 88.7%               |
| 018          | 2408               | 25.5 $\pm$ 37                   | 2.9%                | 103                | 3.3 $\pm$ 22                    | 81.9%               |
| 022          | 13430              | 38.9 $\pm$ 54                   | 1.6%                | 444                | 44.0 $\pm$ 46                   | 0.4%                |
| 027          | 5517               | 37.1 $\pm$ 57                   | 4.6%                | 3268               | 42.2 $\pm$ 42                   | 0.4%                |
| 034          | 4010               | 42.1 $\pm$ 56                   | 2.1%                | 1536               | 45.5 $\pm$ 47                   | 0.4%                |
| 037          | 11401              | 38.5 $\pm$ 55                   | 2.5%                | 310                | 37.5 $\pm$ 41                   | 0.6%                |
| 043          | 55892              | 42.7 $\pm$ 39                   | 0.3%                | 7477               | 34.2 $\pm$ 40                   | 0.8%                |
| 044          | 274                | 46.4 $\pm$ 51                   | 0.6%                | 68                 | 2.5 $\pm$ 9                     | 48.6%               |
| 047          | 4927               | 25.0 $\pm$ 55                   | 27.8%               | 91                 | 35.0 $\pm$ 39                   | 0.6%                |
| 048          | 13965              | 50.1 $\pm$ 47                   | 0.3%                | 856                | 16.9 $\pm$ 41                   | 35.5%               |
| 053          | 11262              | 8.6 $\pm$ 40                    | 81.0%               | 2469               | 21.8 $\pm$ 52                   | 34.4%               |
| 054          | 14096              | 32.3 $\pm$ 50                   | 4.0%                | 440                | 35.7 $\pm$ 55                   | 3.9%                |
| <b>All</b>   |                    | <b>33.1 <math>\pm</math> 47</b> | <b>10.2%</b>        |                    | <b>27.6 <math>\pm</math> 38</b> | <b>21.5%</b>        |

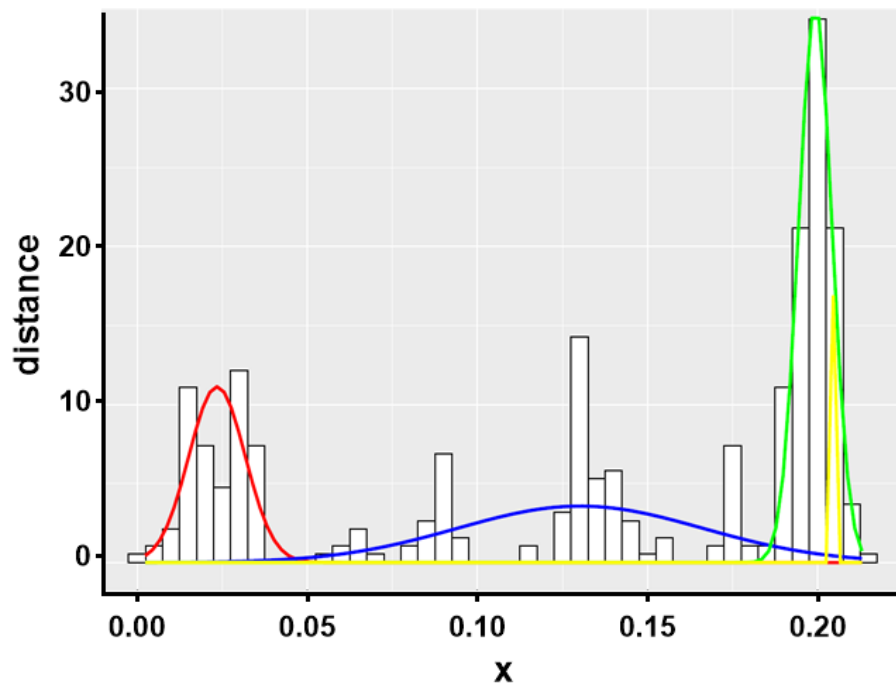

**Fig S1. Distribution of discordant SNPs by whole-genome sequencing.** The proportion of discordant SNPs was determined by calculating the Prevosti distance between all pair-wise comparisons (*i.e.* number of allelic differences/number of possible differences) using the R-package *poppr* (<https://cran.r-project.org/web/packages/poppr/index.html>). Due to the high likelihood of multiclonal infections in *P. vivax*, distances were fitted as the sum of four Gaussian distributions using the R-package *mixtools* (<https://cran.r-project.org/web/packages/mixtools/index.html>). The distribution with the lowest proportion of discordant SNPs (red line) was used to define the threshold (mean plus 3x the standard deviation for that distribution) of homologous recurrence for identify-by-state (IBS) analysis.

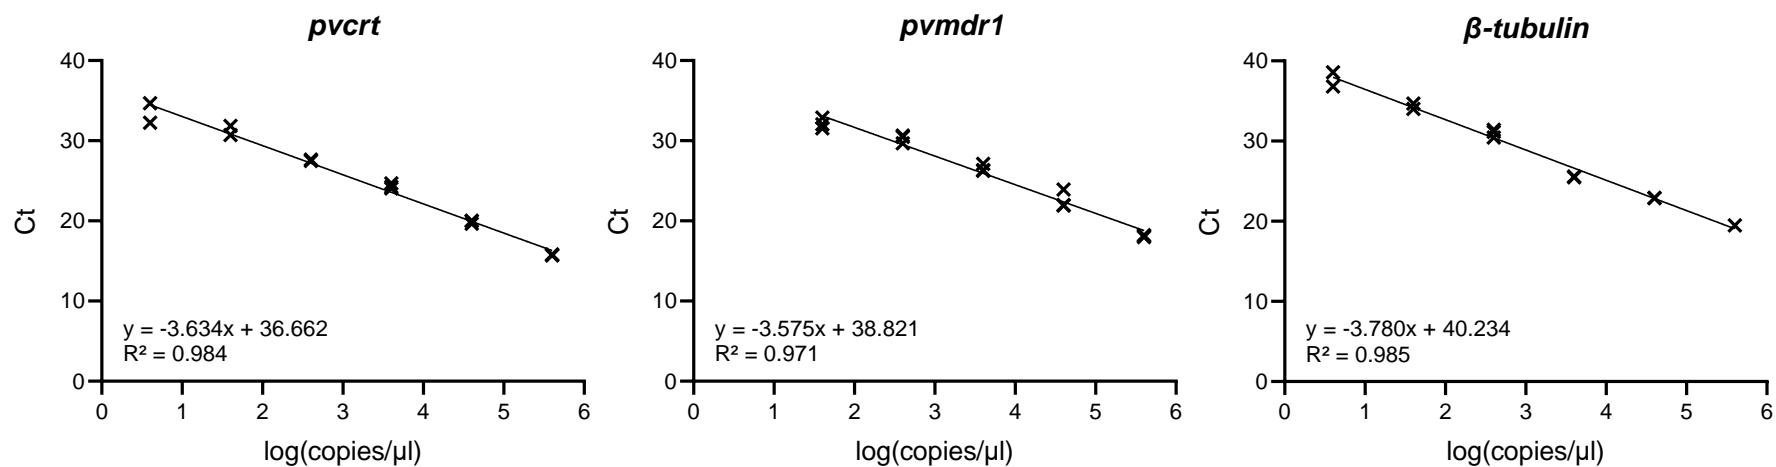

**Fig S2. qPCR standard curves for *pvcr1*, *pvmdr1* and  $\beta$ -*tubulin*.** Standard curves were prepared using 10-fold serial dilutions of dsDNA fragments covering the targeted region in each gene of interest (range 4000000-4 copies/ $\mu$ l). Amplification efficiencies calculated from cycle threshold (Ct) versus dsDNA copy number (log transformed) plots were 1.88, 1.90 and 1.84 for *pvcr1*, *pvmdr1* and  $\beta$ -*tubulin*, respectively.

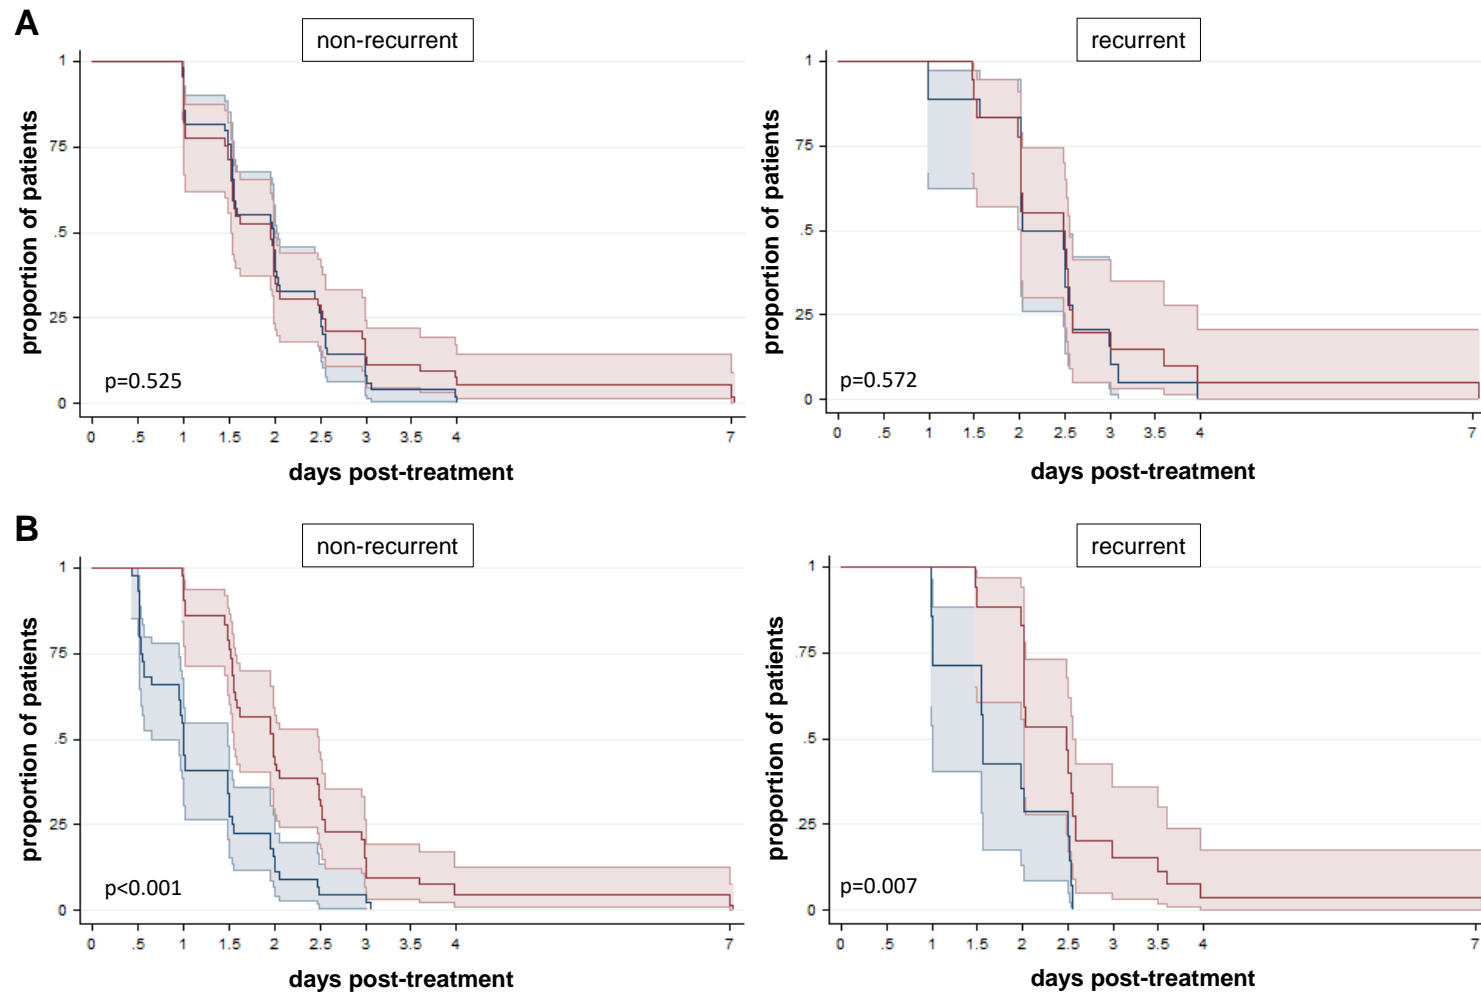

**Fig S3. Time to parasite clearance by treatment outcome.** Kaplan-Meier survival curves for total parasite clearance (A) and gametocyte clearance (B) separated by non-recurrent (n=49) or recurrent (n=18) courses of infection. Curves are stratified by light microscopy (blue line) and qPCR (A; red line) or RTqPCR (B; red line), respectively. Colored areas indicate 95% confidence intervals. P-values were calculated using log-rank test. One patient with no Day 7 sample by qPCR/RTqPCR was excluded from this analysis in the non-recurrent group.



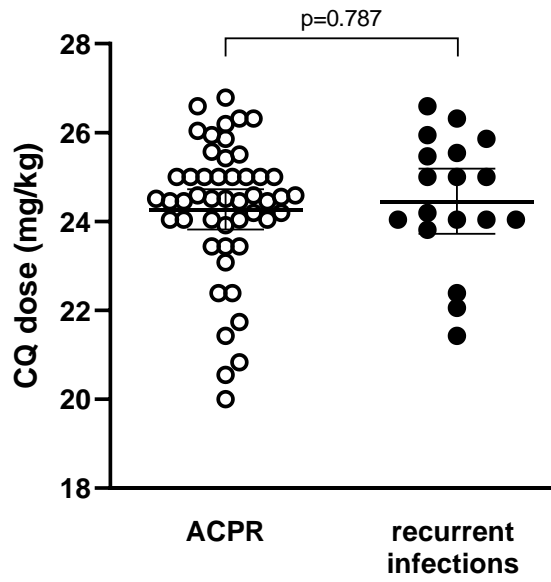

Fig S4. CQ dose received by patients. Graph shows the exact CQ dose administered in mg per kg of body weight, stratified by treatment outcome.

**Table S3. Microsatellites genotyping.** Results of allele calling using Genetools software. Shared alleles between sample pairs at Day 0 and Day of recurrence (DRec) are indicated in bold.

| Patient code | Day  | PvMSP1.F3  |            |         |            |            | MS4        |            | MS10       |         | PvSal1814  |            |            |         |         |         |
|--------------|------|------------|------------|---------|------------|------------|------------|------------|------------|---------|------------|------------|------------|---------|---------|---------|
|              |      | Allele1    | Allele2    | Allele3 | Allele4    | Allele5    | Allele1    | Allele2    | Allele1    | Allele2 | Allele1    | Allele2    | Allele3    | Allele4 | Allele5 | Allele6 |
| 003          | Day0 | <b>264</b> | 313        |         |            |            | 195        | <b>198</b> | 216        |         | <b>528</b> | <b>543</b> | 558        |         |         |         |
|              | DRec | <b>264</b> |            |         |            |            |            | <b>198</b> |            |         | <b>528</b> | <b>543</b> |            |         |         |         |
| 007          | Day0 | 229        |            | 264     | 278        | <b>313</b> | 198        | <b>201</b> | <b>201</b> | 207     | <b>599</b> | <b>614</b> | <b>629</b> |         |         |         |
|              | DRec |            | 259        |         |            | <b>313</b> |            | <b>201</b> | <b>201</b> |         | <b>599</b> | <b>614</b> | <b>629</b> |         |         |         |
| 008          | Day0 | <b>276</b> |            |         |            |            | <b>195</b> |            | <b>201</b> |         | <b>563</b> | <b>578</b> |            |         |         |         |
|              | DRec | <b>276</b> | 325        |         |            |            | <b>195</b> |            | <b>201</b> |         | <b>563</b> | <b>578</b> |            |         |         |         |
| 010          | Day0 | 259        | 306        |         |            |            | 204        |            | 213        |         |            |            |            |         |         |         |
|              | DRec |            |            |         |            |            |            |            |            |         |            |            |            |         |         |         |
| 018          | Day0 | <b>259</b> | 264        | 316     |            |            | 198        | 201        | <b>204</b> | 213     | 510        | 525        | 540        |         |         |         |
|              | DRec | <b>259</b> |            |         |            |            |            |            | <b>204</b> |         |            |            |            |         |         |         |
| 021          | Day0 | 253        |            | 300     |            |            |            | 204        | 195        |         |            |            |            | 573     | 588     | 603     |
|              | DRec |            | 259        |         |            |            | 201        |            |            | 207     | 528        | 543        | 558        |         |         |         |
| 022          | Day0 | 219        | <b>278</b> | 327     |            |            | <b>198</b> |            | <b>195</b> |         | <b>599</b> | 614        | 629        |         |         |         |
|              | DRec |            | <b>278</b> |         |            |            | <b>198</b> |            | <b>195</b> |         | <b>599</b> |            |            |         |         |         |
| 027          | Day0 |            |            | 325     | <b>374</b> |            | <b>201</b> |            | <b>198</b> |         | <b>555</b> | <b>584</b> | <b>599</b> |         |         |         |
|              | DRec | 147        | 197        |         | <b>374</b> |            | <b>201</b> |            | <b>198</b> |         | <b>555</b> | <b>584</b> | <b>599</b> |         |         |         |
| 028          | Day0 | 147        | 197        | 325     | 374        |            | 201        |            | 198        |         |            |            |            |         |         |         |
|              | DRec |            |            |         |            |            |            |            |            |         |            |            |            |         |         |         |
| 034          | Day0 | <b>325</b> |            |         |            |            | <b>201</b> |            | <b>198</b> |         |            | 581        |            | 596     |         |         |
|              | DRec | <b>325</b> |            |         |            |            | <b>201</b> |            | <b>198</b> |         | 555        |            | 584        |         |         |         |
| 037          | Day0 | 259        |            |         |            |            | 201        |            | 201        |         |            |            |            |         |         |         |
|              | DRec |            |            |         |            |            |            |            |            |         |            |            |            |         |         |         |
| 043          | Day0 | 264        | <b>272</b> |         |            |            |            |            | <b>204</b> |         | 555        | 569        | <b>584</b> |         |         |         |
|              | DRec |            | <b>272</b> |         |            |            | 198        |            | <b>204</b> |         |            |            | <b>584</b> | 614     |         |         |
| 044          | Day0 | <b>264</b> |            |         |            |            | 204        |            | <b>210</b> |         | <b>584</b> | <b>599</b> | <b>614</b> |         |         |         |
|              | DRec | <b>264</b> |            |         |            |            |            |            | <b>210</b> |         | <b>584</b> | <b>599</b> | <b>614</b> |         |         |         |
| 047          | Day0 | <b>253</b> | <b>264</b> |         |            |            | 195        | <b>201</b> | 207        |         | 599        |            |            |         |         |         |
|              | DRec | <b>253</b> | <b>264</b> |         |            |            |            | <b>201</b> | 204        |         |            |            |            |         |         |         |
| 048          | Day0 | <b>264</b> |            |         |            |            | <b>223</b> |            | <b>201</b> |         |            |            |            |         |         |         |
|              | DRec | <b>264</b> |            |         |            |            | <b>223</b> |            | <b>201</b> |         | 599        |            |            |         |         |         |
| 050          | Day0 | <b>264</b> |            |         |            |            | 198        |            | <b>213</b> |         | <b>620</b> | 635        |            |         |         |         |
|              | DRec | <b>264</b> |            |         |            |            |            |            | <b>213</b> |         | <b>620</b> |            |            |         |         |         |
| 053          | Day0 | <b>258</b> |            |         |            |            | <b>201</b> |            | <b>201</b> |         |            | <b>573</b> | <b>588</b> |         |         |         |
|              | DRec | <b>258</b> |            |         |            |            | <b>201</b> |            | <b>201</b> |         | 558        | <b>573</b> | <b>588</b> | 603     |         |         |
| 054          | Day0 | <b>250</b> |            |         |            |            | <b>213</b> |            | <b>204</b> |         | <b>620</b> | <b>635</b> |            |         |         |         |
|              | DRec | <b>250</b> |            |         |            |            | <b>213</b> |            | <b>204</b> |         | <b>620</b> | <b>635</b> |            |         |         |         |

**Table S4. Genotyping and categorization of recurrent infections.**

| Patient code                       | Parasite density by LM (p/μl) |      | Microsatellites |      |               |              | SNP barcode |      |           |              | Whole-genome sequencing |      |           |              |            |              |
|------------------------------------|-------------------------------|------|-----------------|------|---------------|--------------|-------------|------|-----------|--------------|-------------------------|------|-----------|--------------|------------|--------------|
|                                    |                               |      | COI             |      | Discordant MS | Type         | COI         |      | Disc. SNP | Type         | COI                     |      | IBS       |              | IBD        |              |
|                                    | Day0                          | DRec | Day0            | DRec |               |              | Day0        | DRec |           |              | Day0                    | DRec | Disc. SNP | Type         | % IBD      | Type         |
| 003                                | 3470                          | 0    | 3               | 2    | 0/3           | homologous   | 1           | 1    | 1/38      | heterologous | -                       | -    | -         | -            | -          | -            |
| 007                                | 41506                         | 769  | 4               | 3    | 0/4           | homologous   | 2           | 1    | 2/38      | heterologous | >1                      | >1   | 14.3%     | heterologous | 35.2%      | heterologous |
| 008                                | 6068                          | 3428 | 2               | 2    | 0/4           | homologous   | 1           | 1    | 0/37      | homologous   | 1                       | 1    | 2.2%      | homologous   | 99.9%      | homologous   |
| 010                                | 5431                          | 212  | 2               | -    | -             | -            | 1           | 2    | 1/38      | heterologous | -                       | -    | -         | -            | -          | -            |
| 018                                | 2408                          | 103  | 3               | 1    | 0/2           | homologous   | 2           | -    | -         | -            | >1                      | -    | -         | -            | -          | -            |
| 021                                | 3369                          | 1225 | 3               | 3    | 4/4           | heterologous | 2           | -    | -         | -            | -                       | -    | -         | -            | -          | -            |
| 022                                | 13430                         | 444  | 3               | 1    | 0/4           | homologous   | 1           | 2    | 0/37      | homologous   | 1                       | >1   | 6.8%      | heterologous | 98.1%      | homologous   |
| 027                                | 5517                          | 3268 | 3               | 3    | 0/4           | homologous   | 1           | -    | -         | -            | 1                       | 1    | 2.3%      | homologous   | 99.5%      | homologous   |
| 028                                | 6849                          | 24   | 4               | -    | -             | -            | 1           | -    | -         | -            | -                       | -    | -         | -            | -          | -            |
| 034                                | 4010                          | 1536 | 2               | 2    | 1/4           | heterologous | 1           | 2    | 0/38      | homologous   | 1                       | 1    | 1.6%      | homologous   | 99.8%      | homologous   |
| 037                                | 11401                         | 310  | 1               | -    | -             | -            | 1           | -    | -         | -            | 1                       | 1    | 2.0%      | homologous   | 99.7%      | homologous   |
| 043                                | 55892                         | 7477 | 3               | 2    | 0/3           | homologous   | 1           | 2    | 1/38      | heterologous | >1                      | 1    | 12.6%     | heterologous | 99.8%      | homologous   |
| 044                                | 274                           | 68   | 3               | 3    | 0/3           | homologous   | -           | 2    | -         | -            | >1                      | -    | -         | -            | -          | -            |
| 047                                | 4927                          | 91   | 2               | 2    | 1/3           | heterologous | 2           | 2    | 0/22      | homologous   | >1                      | >1   | 8.0%      | heterologous | 32.5%      | heterologous |
| 048                                | 13965                         | 856  | 1               | 1    | 0/3           | homologous   | 1           | 2    | 0/20      | homologous   | 1                       | 1    | 1.7%      | homologous   | 99.5%      | homologous   |
| 050                                | 5852                          | 0    | 2               | 1    | 0/3           | homologous   | 1           | -    | -         | -            | -                       | -    | -         | -            | -          | -            |
| 053                                | 11262                         | 2469 | 2               | 4    | 0/4           | homologous   | 1           | 2    | 0/38      | homologous   | -                       | 1    | -         | -            | -          | -            |
| 054                                | 14096                         | 440  | 2               | 2    | 0/4           | homologous   | 1           | 2    | 5/38      | heterologous | 1                       | 1    | 2.4%      | homologous   | 100%       | homologous   |
| <b>Homologous recurrence rate:</b> |                               |      | 12/15 (80%)     |      |               |              | 6/11 (55%)  |      |           |              | 6/10 (60%)              |      |           |              | 8/10 (80%) |              |

*LM*, light microscopy; *DRec*, samples at day of recurrence; *COI*, complexity of infection; *MS*, microsatellites (*Pvmsp1F3+MS4+MS10+PvSal1814*); *IBS*, identity-by-state; *IBD*, identity-by-descent.

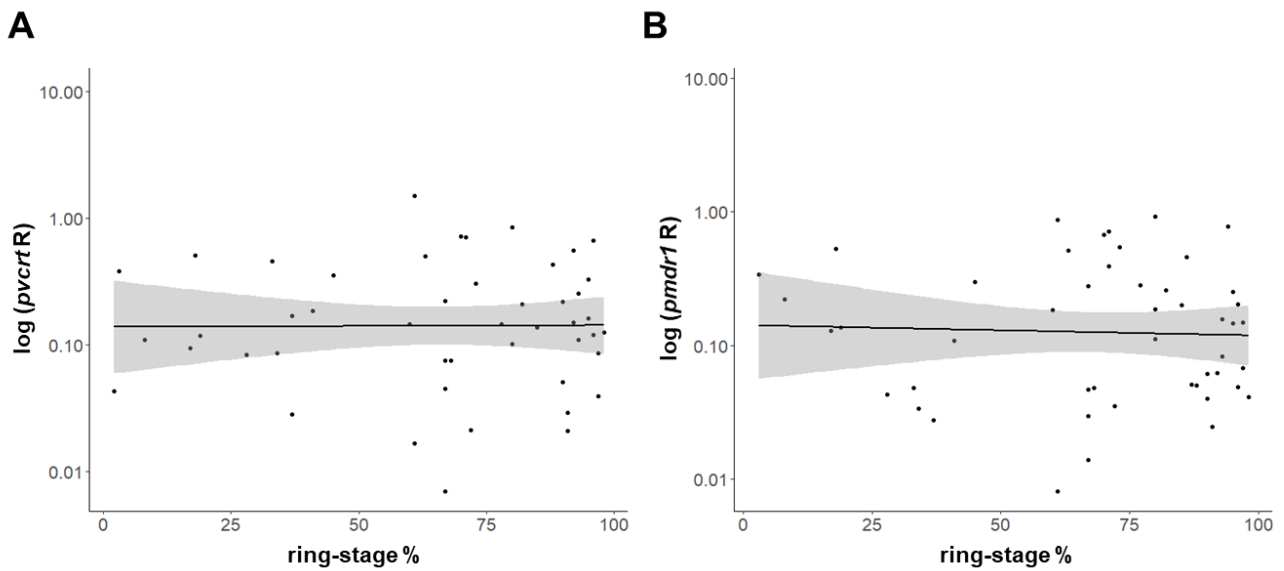

**Fig S5. Gene expression of *pvcrt* and *pmdr1* and proportion of ring-stages in infections at Day 0.** Gene expression ratios (R) of *pvcrt* (A) and *pmdr1* (B) relative to reference gene  $\beta$ -*tubulin* are displayed in log-scale (y axis). Linear regression was fitted to data (black line with standard error bounds in grey) did not show an association between R and ring-stage percentage (*pvcrt*: coef. $=-0.0003$ ,  $p=0.886$ ; *pmdr1*: coef. $=-0.001$ ,  $p=0.655$ ).

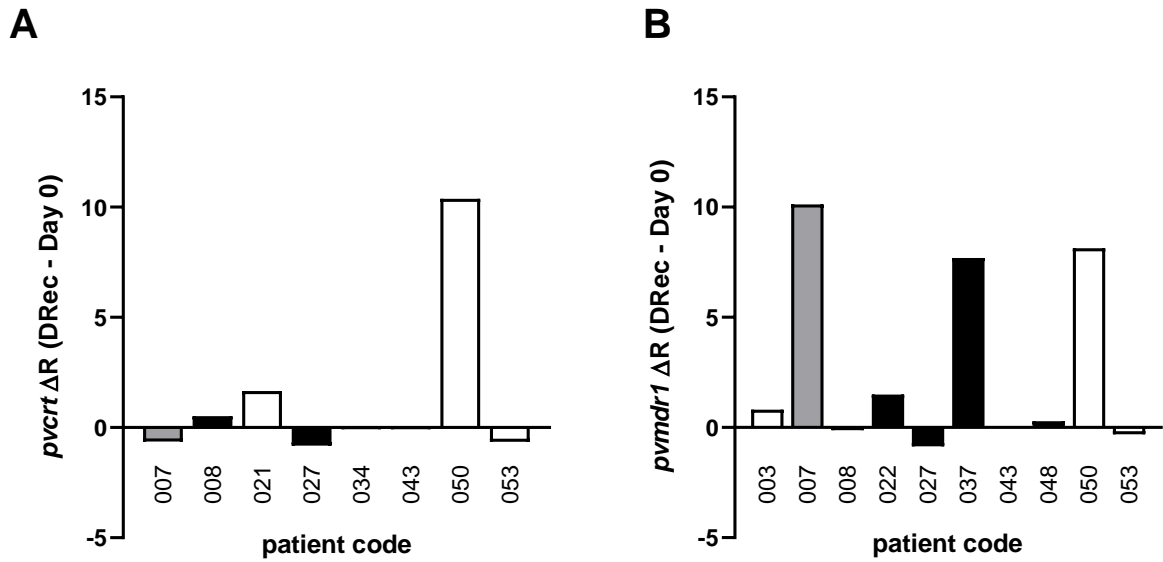

**Fig S6. Gene expression of *pvcr1* and *pvmdr1* in Day 0/DRec paired samples.** Differences in gene expression ratio R between infections at DRec and paired infections at Day 0 are shown for both *pvcr1* (A) and *pvmdr1* (B). Type of recurrences based on identity-by-descent (IBD) analysis is shown with coloured bars (black, IBD-homologous recurrence; grey, IBD-heterologous recurrence; white, undetermined by WGS).
